# Supplementary material for: A new tetraarylcyclopentadienone based low molecular weight gelator: synthesis, self-assembly properties and anion recognition
Source: Royal Society of Chemistry journal article supplement (doi:10.1039/c2nj40073a), 2012-01-01
Supplement: c2nj40073a.pdf [file c2nj40073a.pdf]

## Supporting Information

### **A New Tetra-arylcyclopentadienone Based Low Molecular Weight Gelator: Synthesis, Self-Assembly Properties and Anion Recognition**

**Mattia Boiani,<sup>a</sup> Andrea Baschieri,<sup>a</sup> Cristiana Cesari,<sup>b</sup> Rita Mazzoni,<sup>b</sup> Stefano Stagni,<sup>b</sup> Stefano Zacchini<sup>b</sup> and Letizia Sambri<sup>\*a</sup>**

- [a] M. Boiani, Dr. A. Baschieri, Dr. L. Sambri Dipartimento di Chimica Organica "A. Mangini", University of Bologna, v.le Risorgimento 4, 40136 Bologna, Italy; Fax: (+) 39-051-2093654 ; e-mail: letizia.sambri@unibo.it
- [b] Dr. R. Mazzoni, C. Cesari, Dr. S. Stagni, Prof. S. Zacchini Dipartimento di Chimica Fisica ed Inorganica, University of Bologna, v.le Risorgimento 4, 40136 Bologna, Italy.

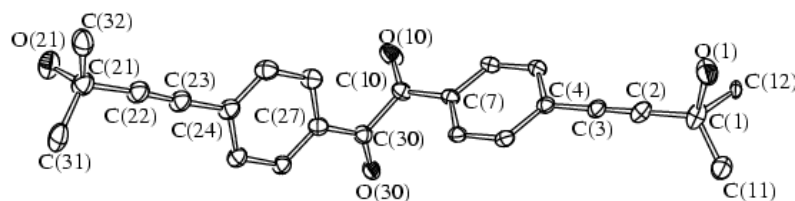

**Figure 1S.** ORTEP drawing of **6a** with key atoms labelled. Displacement ellipsoids are at the 30% probability level. H-atoms have been omitted for clarity. Only the main images of the disordered groups are represented.

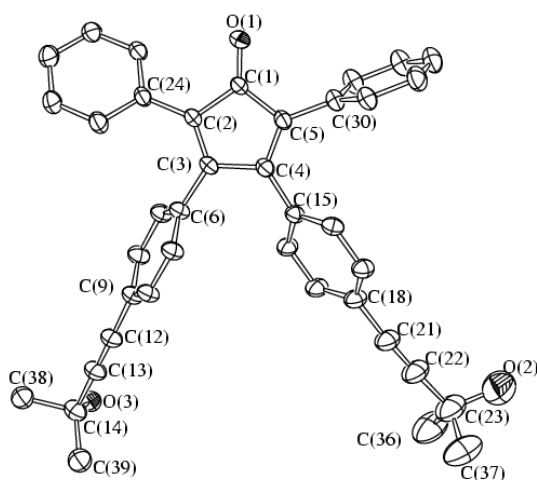

**Figure 2S.** ORTEP drawing of **1a** with key atoms labelled. Displacement ellipsoids are at the 30% probability level. H-atoms have been omitted for clarity. Only the main images of the disordered groups are represented.

**Table 1S.** Selected Bond Lengths (Å) and angles (°) for **6a**. Only the main images of disordered groups are considered.

|                   |          |                   |           |
|-------------------|----------|-------------------|-----------|
| C(10)-C(30)       | 1.538(6) |                   |           |
| C(10)-O(10)       | 1.211(5) | C(30)-O(30)       | 1.213(5)  |
| C(7)-C(10)        | 1.466(6) | C(27)-C(30)       | 1.444(7)  |
| C(3)-C(4)         | 1.434(6) | C(23)-C(24)       | 1.431(9)  |
| C(2)-C(3)         | 1.193(6) | C(22)-C(23)       | 1.171(11) |
| C(1)-C(2)         | 1.471(6) | C(21)-C(22)       | 1.462(12) |
|                   |          |                   |           |
| O(10)-C(10)-C(7)  | 123.4(4) | O(30)-C(30)-C(27) | 127.8(5)  |
| O(10)-C(10)-C(30) | 117.6(4) | O(30)-C(30)-C(10) | 115.8(4)  |
| C(7)-C(10)-C(30)  | 118.9(4) | C(27)-C(30)-C(10) | 116.2(5)  |
| C(2)-C(3)-C(4)    | 177.4(5) | C(22)-C(23)-C(24) | 175.3(12) |
| C(3)-C(2)-C(1)    | 179.2(5) | C(23)-C(22)-C(21) | 175.6(13) |

**Table 2S.** Selected Bond Lengths (Å) and angles (°) for **1a**. Only the main images of disordered groups are considered.

|                   |           |                   |           |
|-------------------|-----------|-------------------|-----------|
| C(1)-O(1)         | 1.221(9)  | C(3)-C(4)         | 1.516(11) |
| C(1)-C(2)         | 1.520(10) | C(1)-C(5)         | 1.471(11) |
| C(2)-C(3)         | 1.337(10) | C(4)-C(5)         | 1.354(10) |
| C(3)-C(6)         | 1.499(11) | C(4)-C(15)        | 1.474(11) |
| C(9)-C(12)        | 1.438(11) | C(18)-C(21)       | 1.443(13) |
| C(12)-C(13)       | 1.186(11) | C(21)-C(22)       | 1.189(12) |
| C(13)-C(14)       | 1.487(12) | C(22)-C(23)       | 1.474(15) |
|                   |           |                   |           |
| C(5)-C(1)-C(2)    | 108.0(7)  | C(3)-C(2)-C(1)    | 105.6(7)  |
| C(2)-C(3)-C(4)    | 110.4(7)  | C(5)-C(4)-C(3)    | 108.9(7)  |
| C(4)-C(5)-C(1)    | 107.1(7)  |                   |           |
| C(13)-C(12)-C(9)  | 173.7(11) | C(22)-C(21)-C(18) | 175.1(12) |
| C(12)-C(13)-C(14) | 179.8(12) | C(21)-C(22)-C(23) | 176.5(14) |

Crystal data and collection details for **1a** and **6a** are listed in Table 6.

**Table 3S.** Crystal data and details of the structure refinement for **1a** and **6a**.

|                                                | <b>1a</b>                                      | <b>6a</b>                                      |
|------------------------------------------------|------------------------------------------------|------------------------------------------------|
| Formula                                        | C <sub>39</sub> H <sub>32</sub> O <sub>3</sub> | C <sub>24</sub> H <sub>22</sub> O <sub>4</sub> |
| <i>F</i> <sub>w</sub>                          | 548.65                                         | 374.42                                         |
| <i>λ</i> , Å                                   | 0.71073                                        | 0.71073                                        |
| Temperature, K                                 | 293(2)                                         | 100(2)                                         |
| Crystal system                                 | Triclinic                                      | Monoclinic                                     |
| Space group                                    | <i>P</i> $\bar{1}$                             | <i>C</i> 2/ <i>c</i>                           |
| <i>a</i> , Å                                   | 6.0489(17)                                     | 23.681(8)                                      |
| <i>b</i> , Å                                   | 13.222(4)                                      | 4.9756(18)                                     |
| <i>c</i> , Å                                   | 20.272(6)                                      | 33.914(12)                                     |
| <i>α</i> , °                                   | 73.883(4)                                      | 90                                             |
| <i>β</i> , °                                   | 86.839(4)                                      | 94.726(5)                                      |
| <i>γ</i> , °                                   | 77.762(4)                                      | 90                                             |
| Cell volume, Å <sup>3</sup>                    | 1522.3(7)                                      | 3983(2)                                        |
| <i>Z</i>                                       | 2                                              | 8                                              |
| <i>D</i> <sub>c</sub> , g cm <sup>-3</sup>     | 1.197                                          | 1.249                                          |
| <i>μ</i> , mm <sup>-1</sup>                    | 0.074                                          | 0.084                                          |
| <i>F</i> (000)                                 | 580                                            | 1584                                           |
| <i>θ</i> limits, °                             | 1.64-22.46                                     | 2.02-25.03                                     |
| Reflections collected                          | 11783                                          | 17291                                          |
| Independent reflections                        | 3958<br>( <i>R</i> <sub>int</sub> = 0.1420)    | 3419<br>( <i>R</i> <sub>int</sub> = 0.0479)    |
| Data/restraints /parameters                    | 3958/321/377                                   | 3419/622/366                                   |
| Goodness on fit on <i>F</i> <sup>2</sup>       | 1.008                                          | 1.020                                          |
| <i>RI</i> ( <i>I</i> > 2σ( <i>I</i> ))         | 0.1055                                         | 0.0986                                         |
| <i>wR</i> <sup>2</sup> (all data)              | 0.3554                                         | 0.2948                                         |
| Largest diff. peak and hole, e.Å <sup>-3</sup> | 0.614 and -0.577                               | 0.779 and -0.678                               |

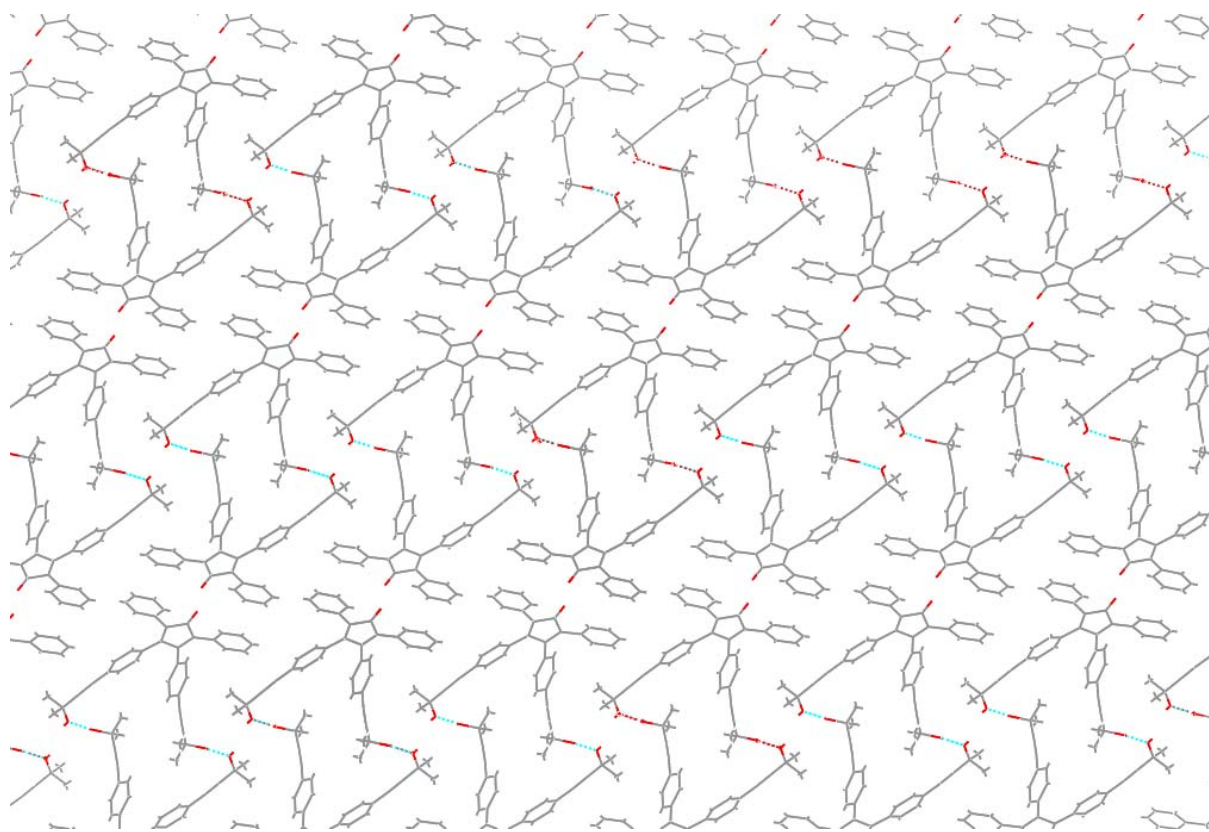

**Figure 3S:** View along the *a* axis of the crystal packing of **1a**. Oxygen atoms are in red; H-bonds dotted blue lines.

**Table 4S:**  $T_g$  of **1a**-gel in toluene at various concentrations ( $c$ ) and the natural logarithm of the concentration and  $1/T_g$  values.

| entry | $c$ (M) | $T_g$ (°K) | $\ln c$  | $1/T$    |
|-------|---------|------------|----------|----------|
| 1     | 0.01260 | 323        | -4.37406 | 0.003096 |
| 2     | 0.01360 | 324        | -4.29769 | 0.003086 |
| 3     | 0.01800 | 326        | -4.01738 | 0.003067 |
| 4     | 0.02500 | 329        | -3.68888 | 0.00304  |
| 5     | 0.03650 | 332        | -3.31044 | 0.003012 |
| 6     | 0.04500 | 335        | -3.10109 | 0.002985 |

**Table 5S:**  $T_g$  of **1a**-gel in nitromethane at various concentrations ( $c$ ) and the natural logarithm of the concentration and  $1/T_g$  values.

| entry | $c$ (M) | $T_g$ (K) | $\ln c$  | $1/T$    |
|-------|---------|-----------|----------|----------|
| 1     | 0.00869 | 321       | -4.74558 | 0.003115 |
| 2     | 0.01330 | 328       | -4.31999 | 0.003049 |
| 3     | 0.02000 | 333       | -3.91202 | 0.003003 |
| 4     | 0.02600 | 336       | -3.64966 | 0.002976 |
| 5     | 0.03320 | 341       | -3.40521 | 0.002933 |

**Figure 4S:** SEM images of xerogels of **1a** in various solvents

Acetonitrile

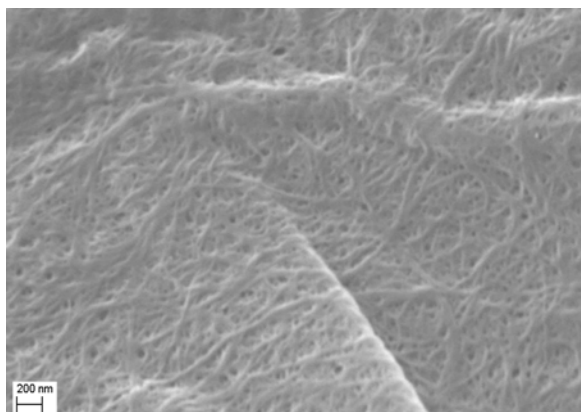

Nitromethane

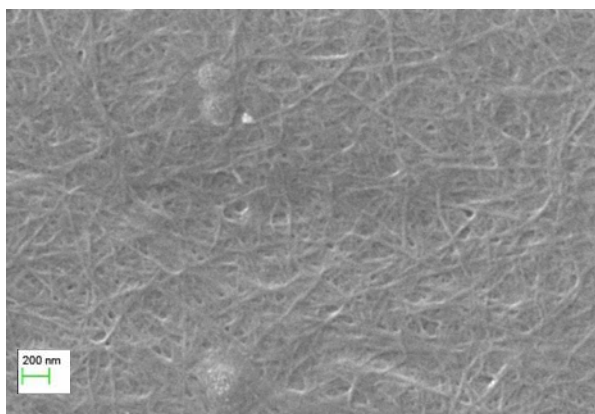

Benzene

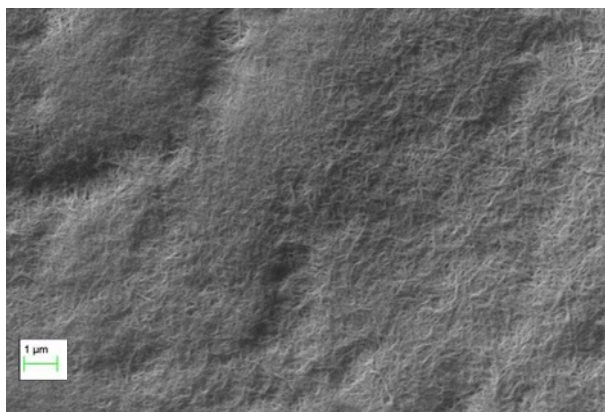

toluene

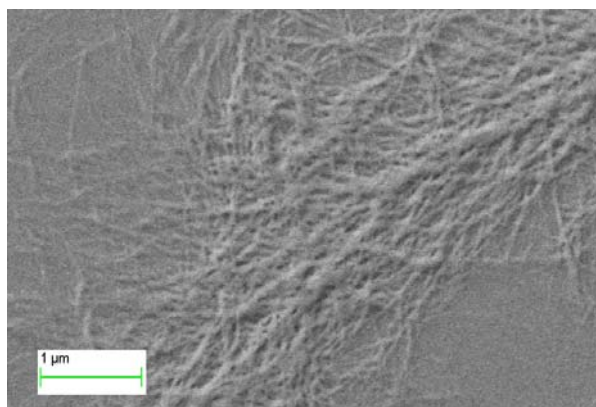

*o*-xylene

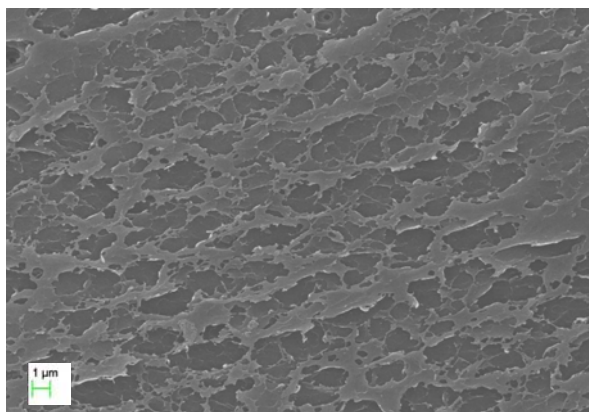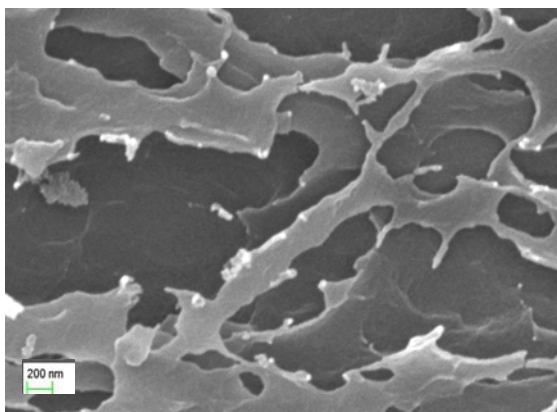

*m*-xylene

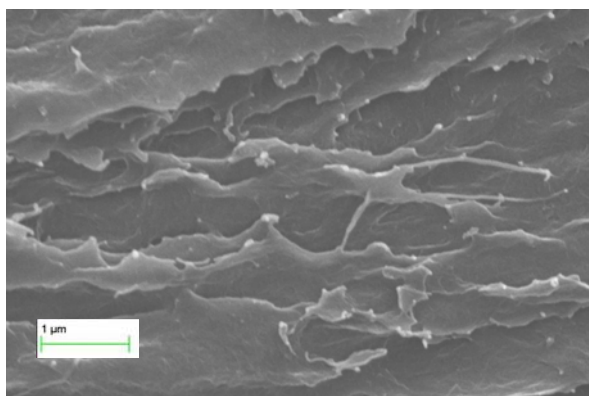



*p*-xylene

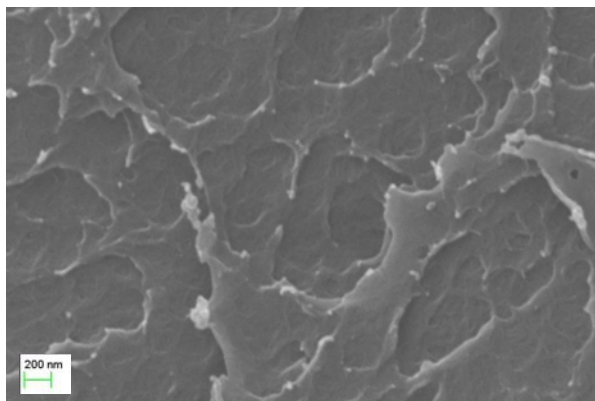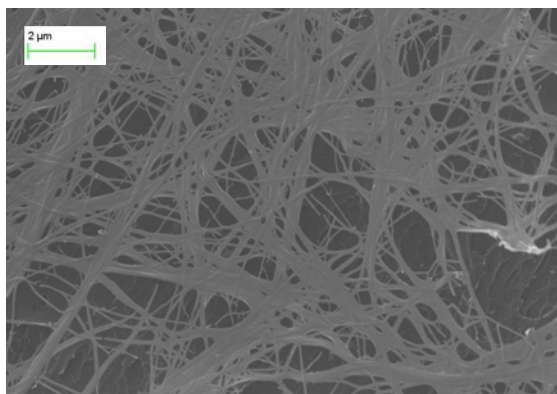

mesitilene

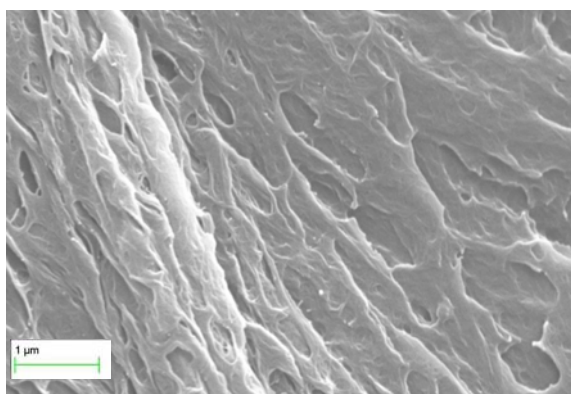



**Figure 5S:**  $^1\text{H}$  NMR spectrum of **1a** in  $\text{CD}_3\text{CN}$  (a) and  $\text{CD}_3\text{CN}+\text{D}_2\text{O}$  (b).

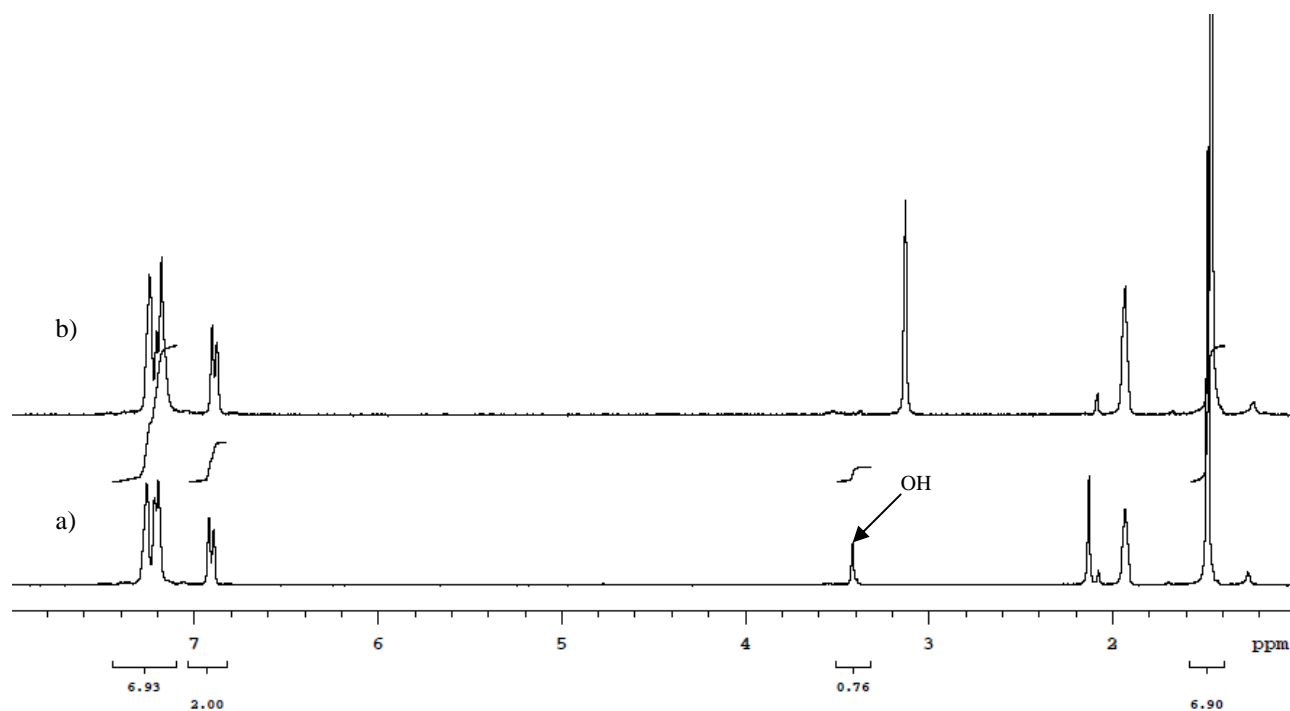

**Figure 6S:**  $^1\text{H}$  NMR spectrum of **1a** in  $\text{CD}_3\text{CN}$  at different concentrations at  $25^\circ\text{C}$

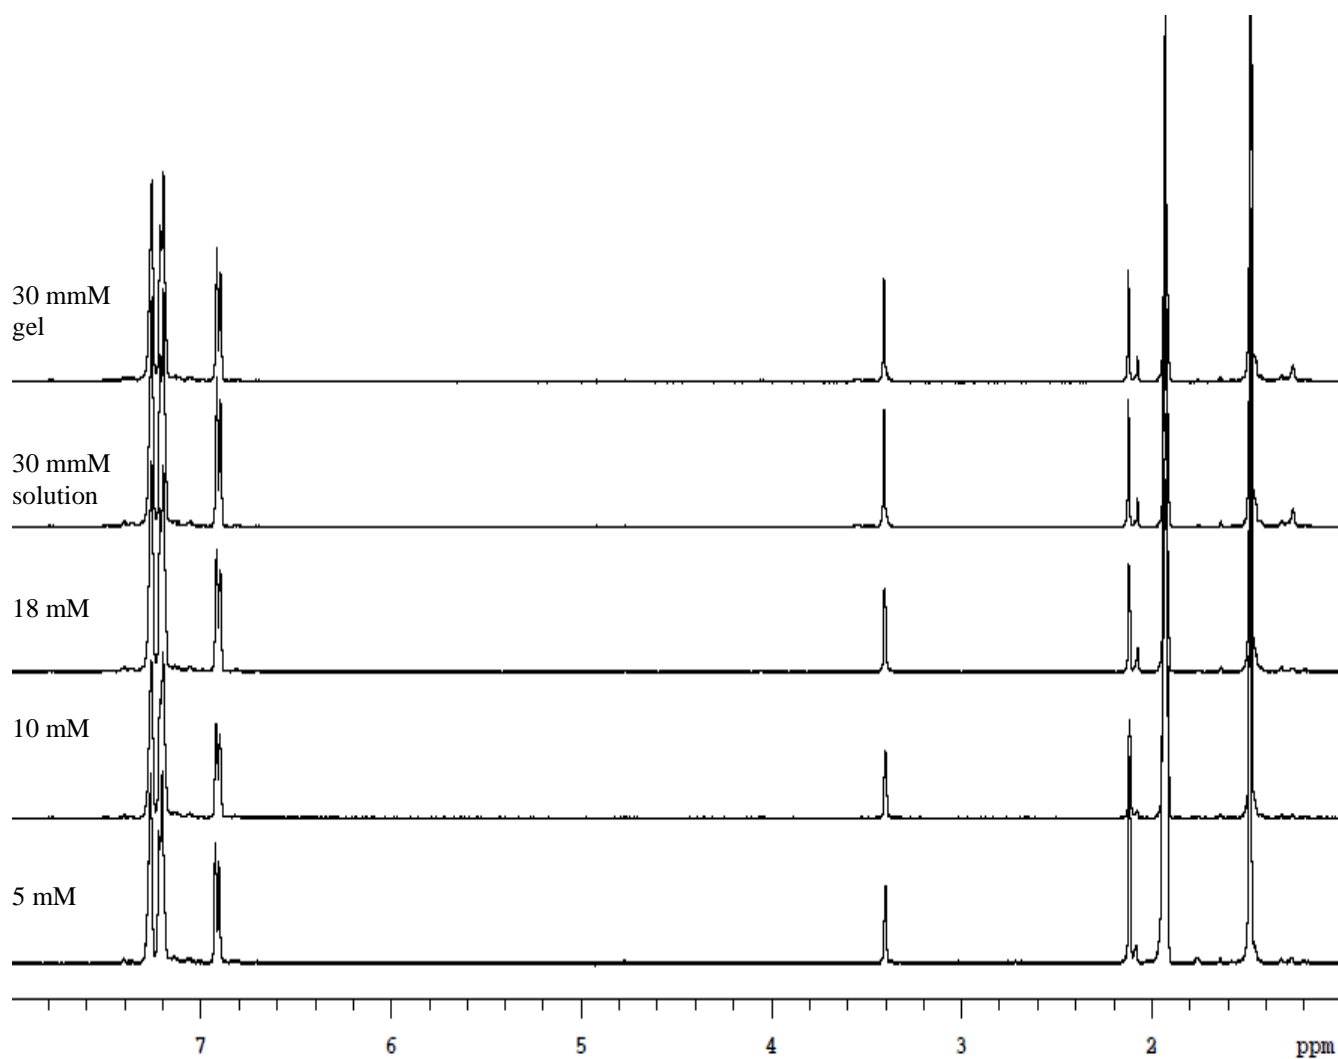

**Figure 7S:**  $^1\text{H}$  NMR spectrum of **1a** in  $\text{CD}_3\text{NO}_2$  at different concentrations at  $25^\circ\text{C}$

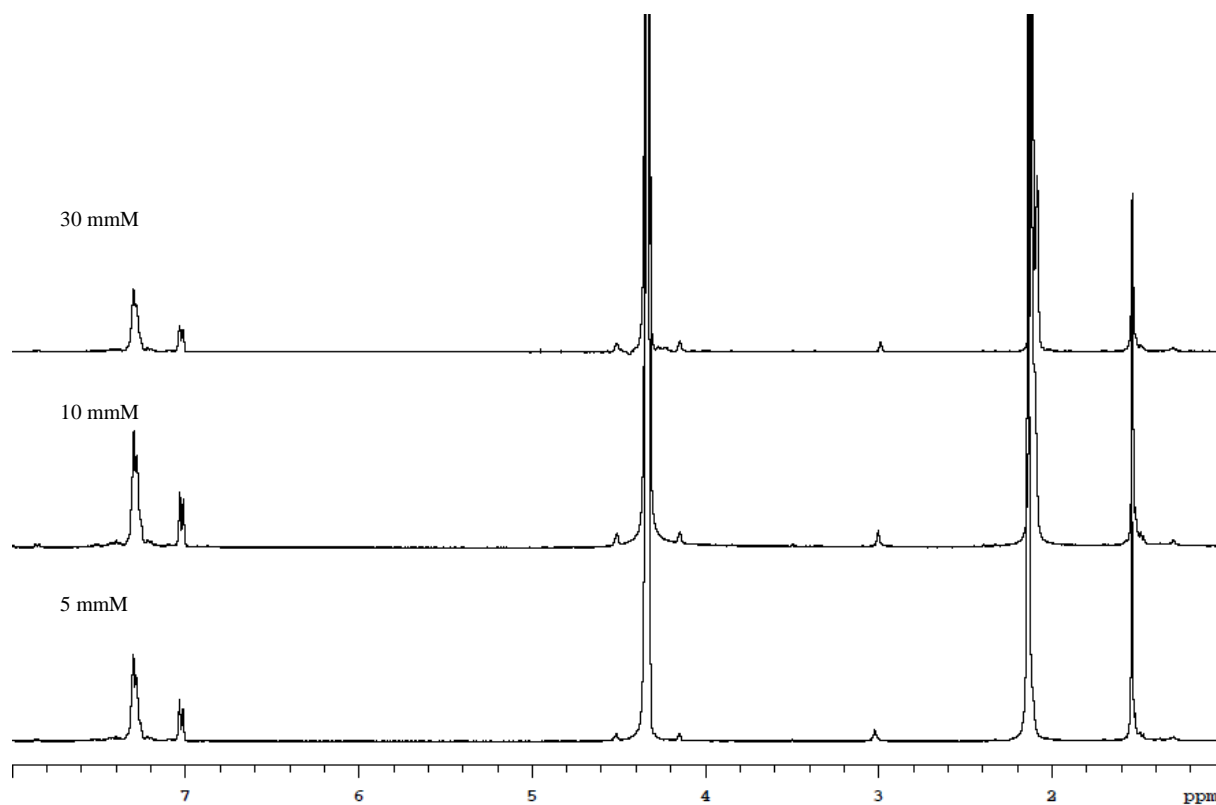

**Figure 8S-a, b, c:** VT- $^1\text{H}$  NMR spectra of **1a** in  $\text{CD}_3\text{NO}_2$  (10mM) ranging from 25 to 85°C

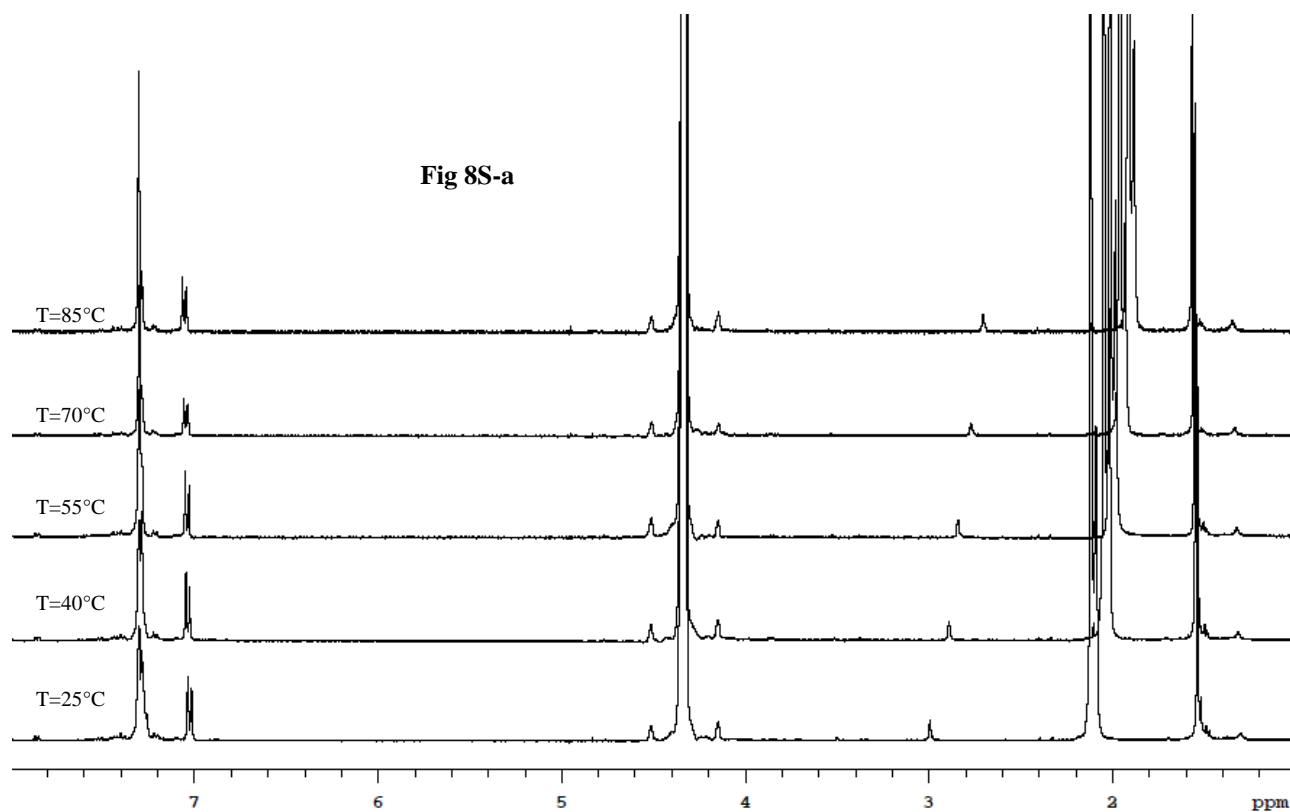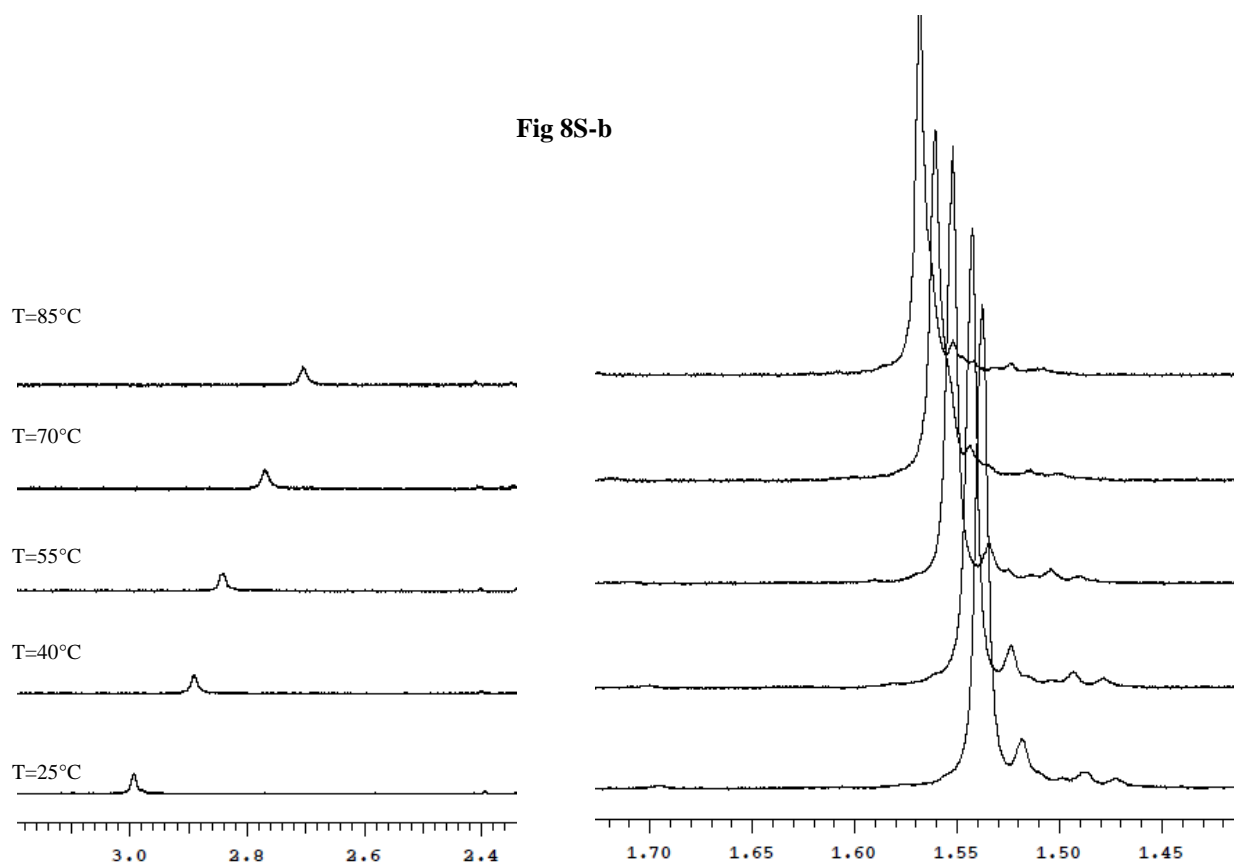

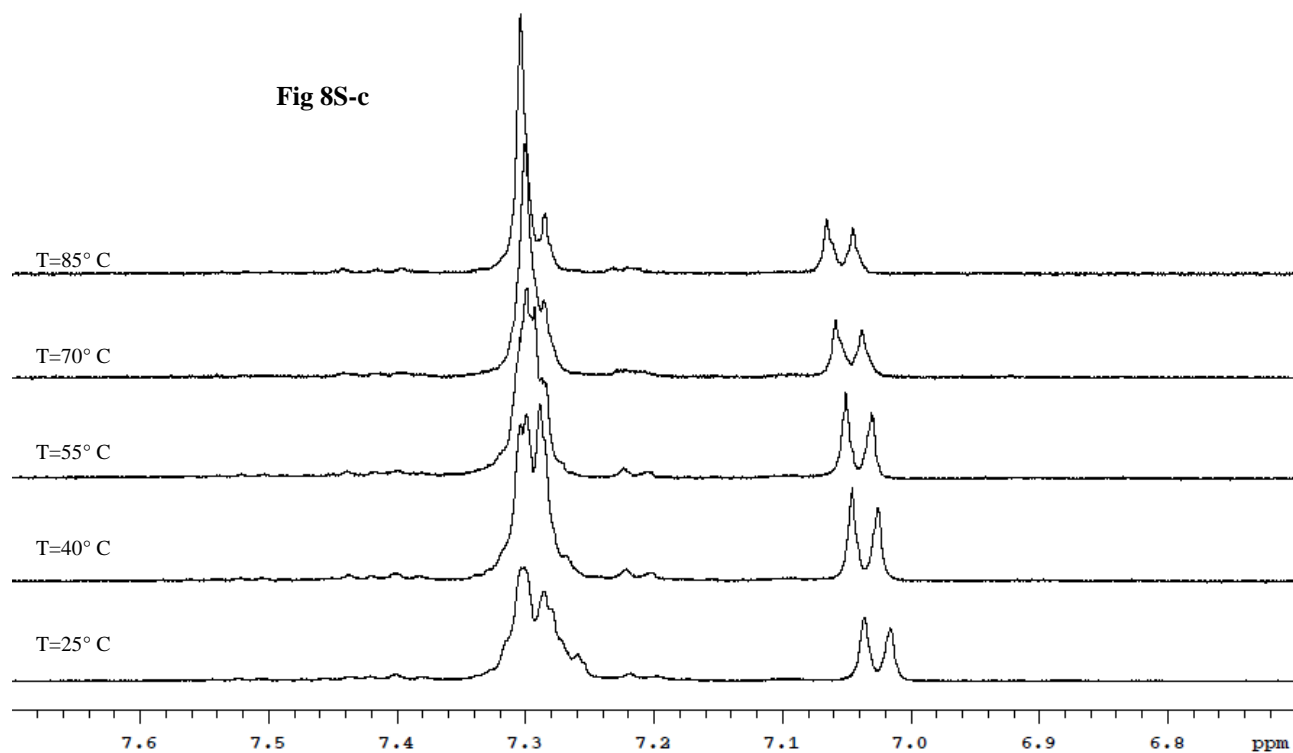

**Figure 9S:**  $^1\text{H}$  NMR spectrum of **1a** in toluene at different concentrations at 25°C

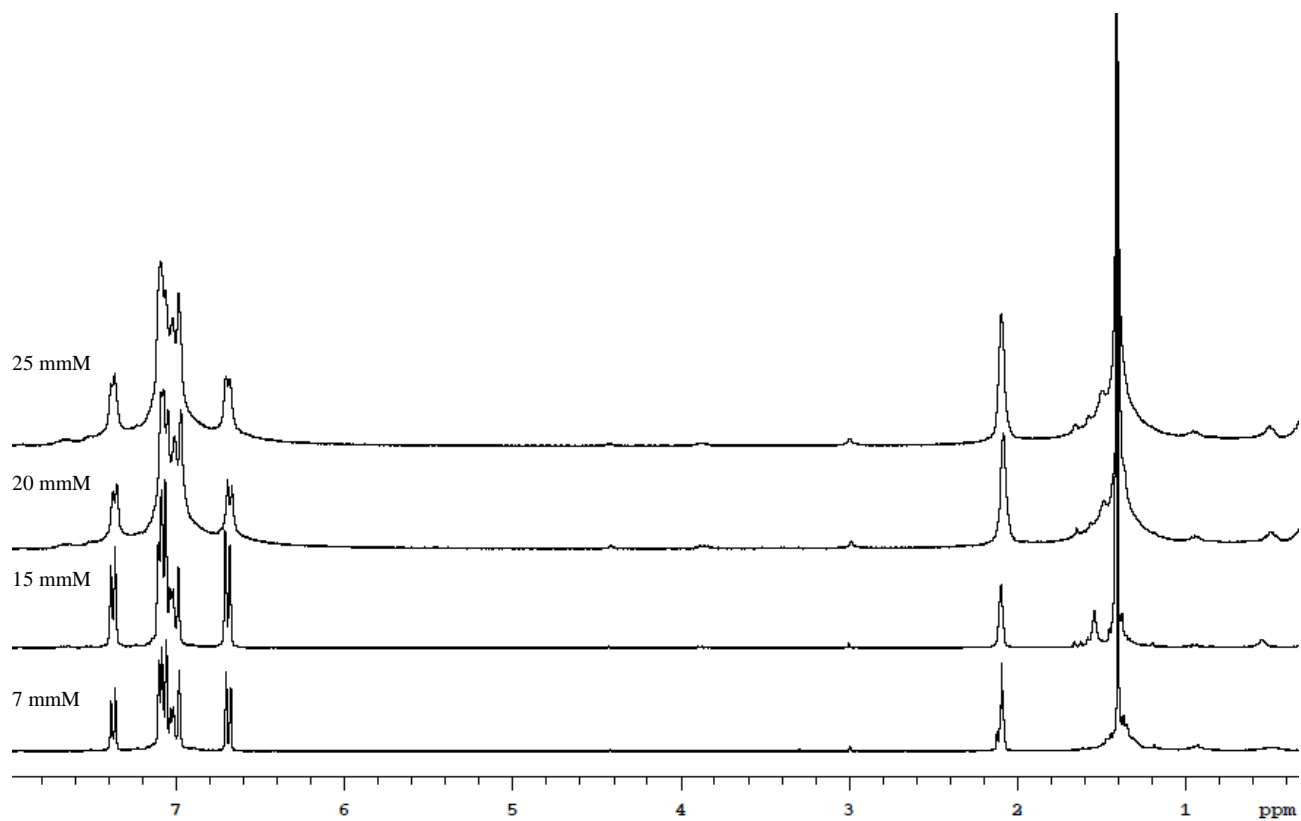

**Figure 10S-a, b, c:** VT- $^1\text{H}$  NMR spectra of **1a** in toluene (14.3 mM) ranging from 25 to 85°C

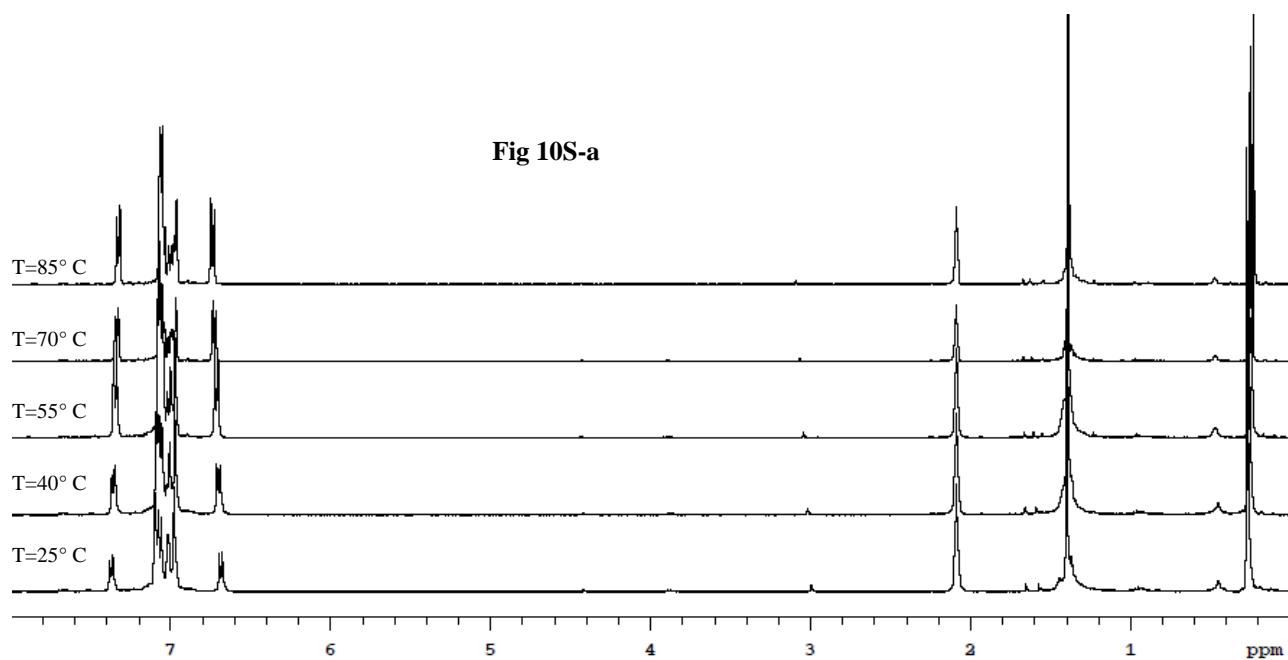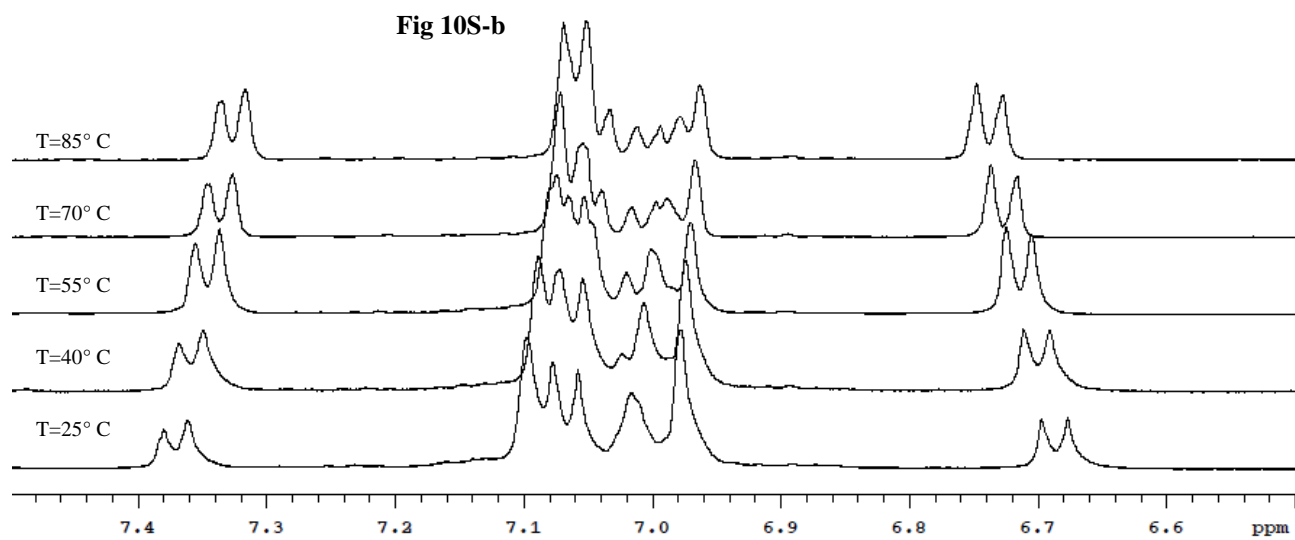

Fig 10S-c

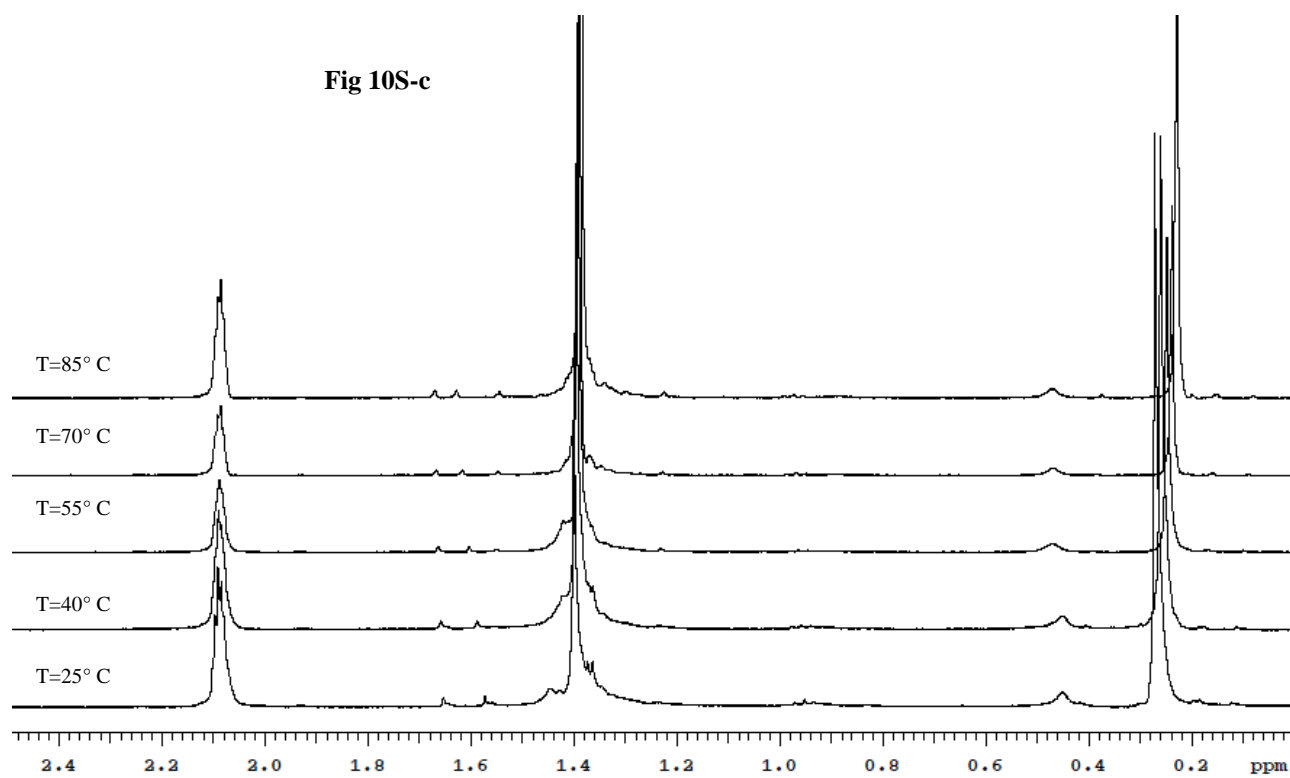

**Figure 11S:** Particular of COSY-NMR spectrum of **1a**-toluene gel (14.3 mM) at 25°C

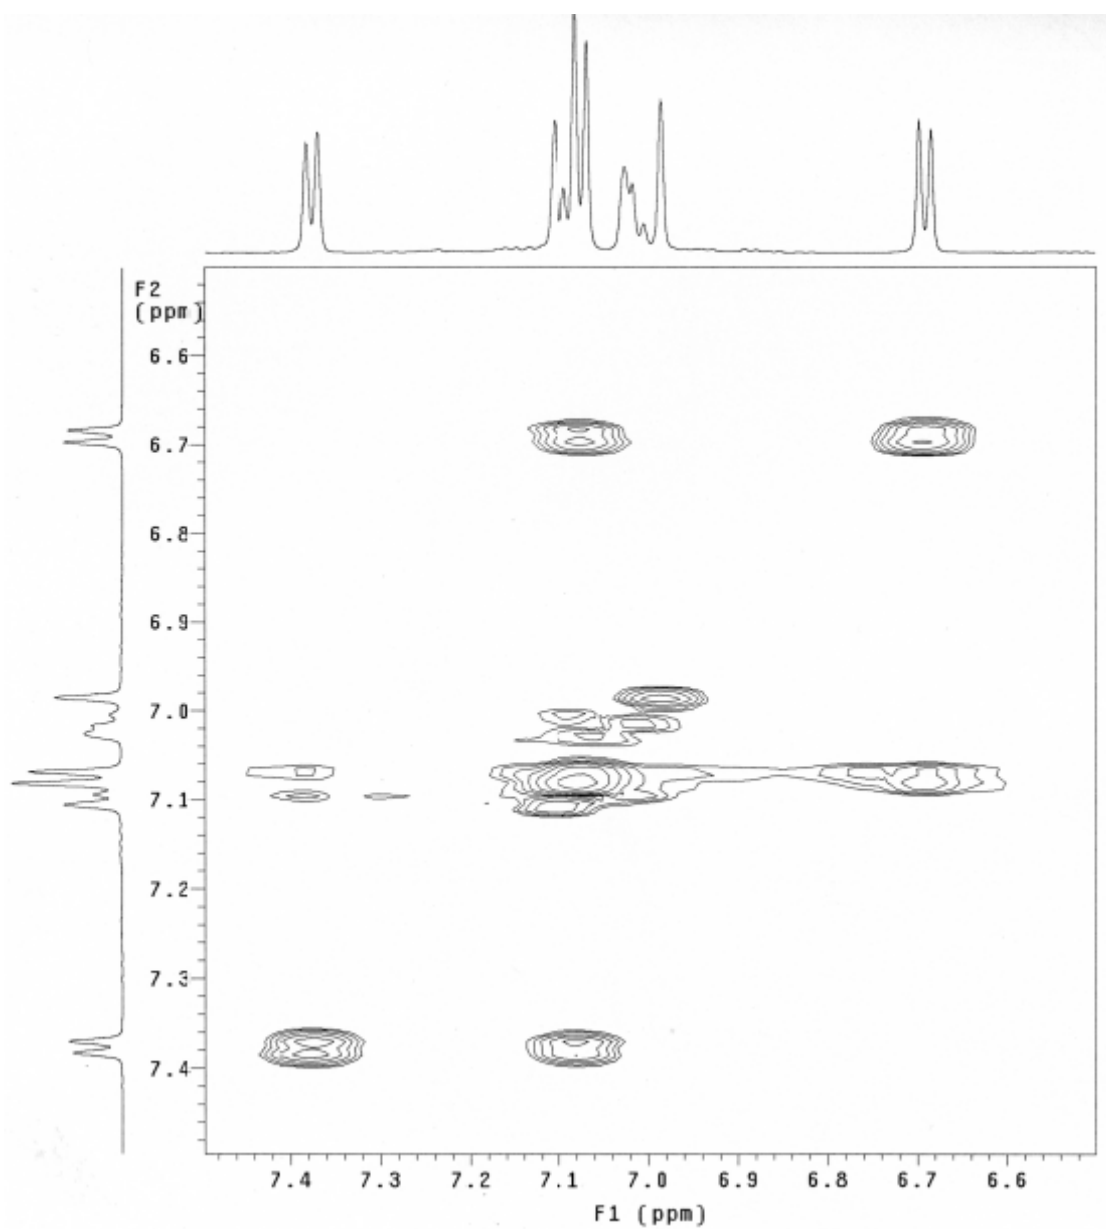



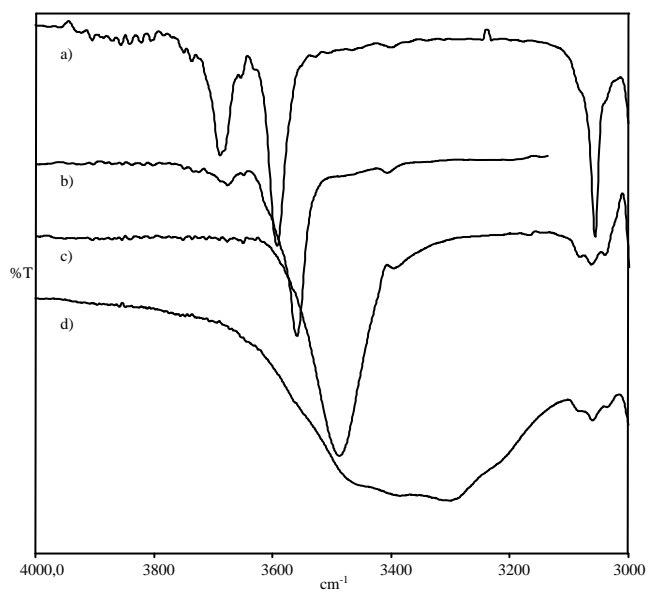

**Figure 12S.** FT-IR spectra of **1a**: a) in DCM solution, b) in *o*-xylene solution; c) in ACN solution and d) xerogel from *o*-xylene.

a)

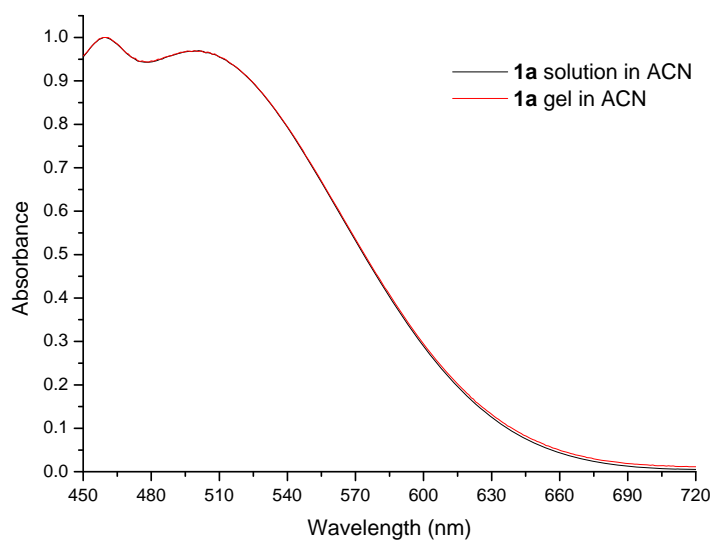

b)

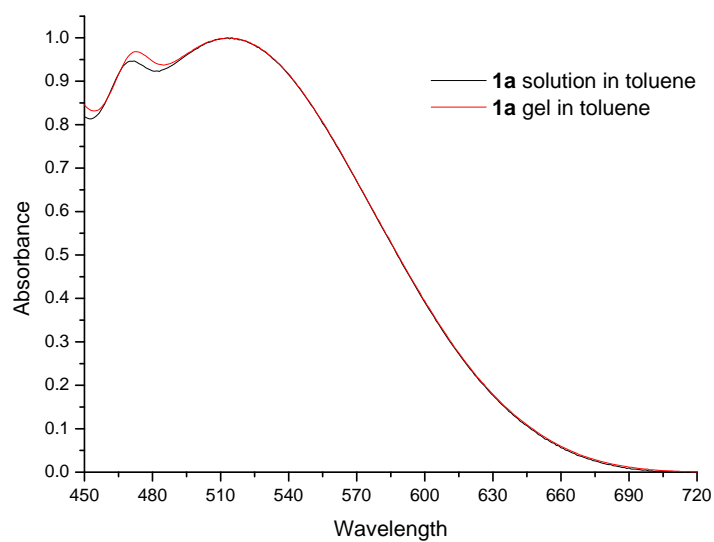

**Figure 13S:** Normalized UV/Vis absorption spectra at room temperature of **1a** in solution (1.0 mM) and in gel in different solvents. a) in ACN, **1a**-gel =24.0 mM, b) in toluene, **1a**-gel =12.6 mM.

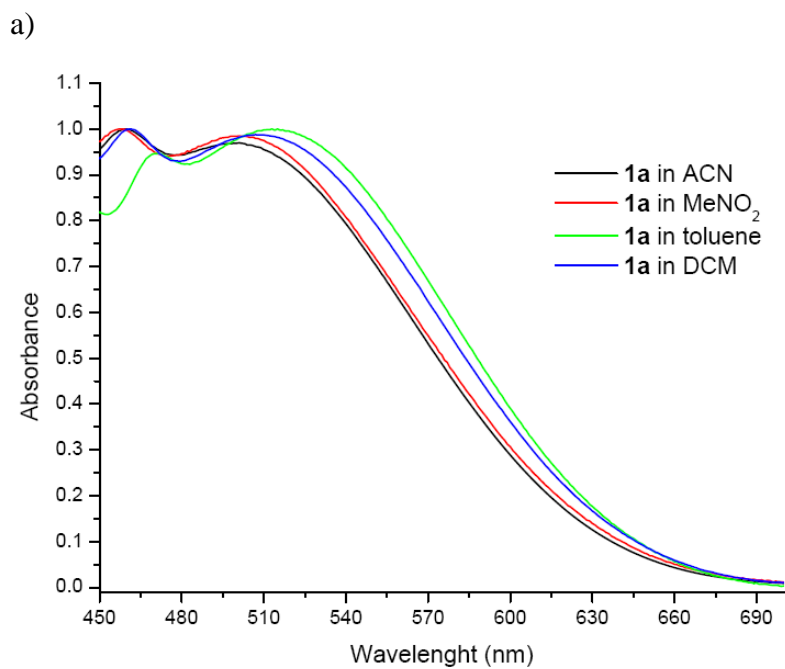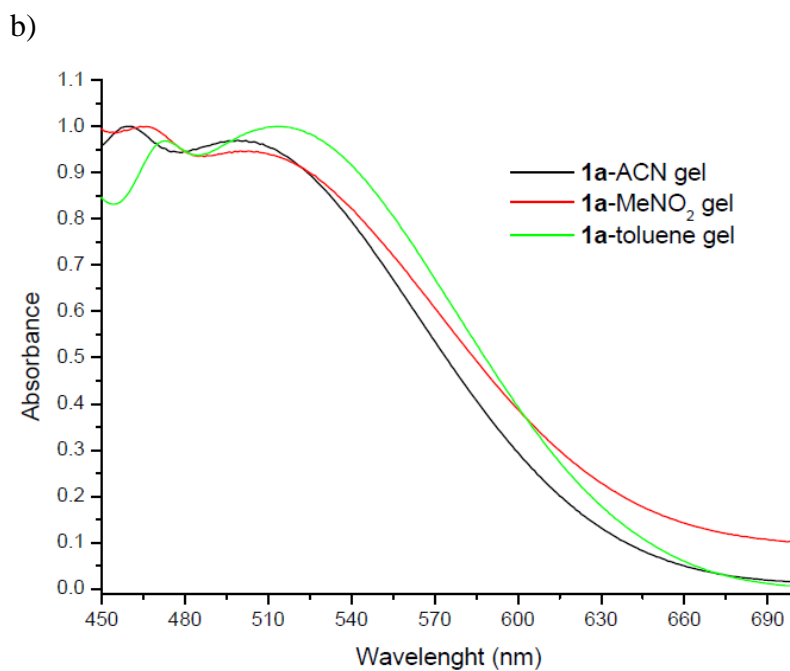

**Figure 14S.** Normalized UV/Vis absorption spectra at room temperature. a) **1a**-solutions (1.0 mM) in ACN, MeNO<sub>2</sub>, toluene and DCM; b) **1a**-gel in ACN (24.0 mM), MeNO<sub>2</sub> (8.7 mM) and toluene (12.6 mM)
